# Supplementary material
Source: PubMed Central journal article supplement (PMC3616898)
Supplement: NIHMS451004-supplement-Online_Data_Supplement_Table_1_.pdf [file NIHMS451004-supplement-Online_Data_Supplement_Table_1_.pdf]

**Online Data Supplement Table 1.** Differences in measures of subclinical atherosclerosis in the carotid, peripheral and coronary vascular beds by airflow obstruction, stratified by smoking history.

|                                                       | Airflow Obstruction Among Smokers |                 |                    |                  | P-trend |
|-------------------------------------------------------|-----------------------------------|-----------------|--------------------|------------------|---------|
|                                                       | None<br>(n=1536)                  | Mild<br>(n=172) | Moderate<br>(n=99) | Severe<br>(n=47) |         |
| <b>Intima Medial Thickness, Internal Carotid (mm)</b> |                                   |                 |                    |                  |         |
| Median value                                          | 0.87                              | 0.93            | 1.06               | 1.29             | <0.001  |
| Age-sex-adjusted mean difference                      | 0                                 | 0.087           | 0.178              | 0.201            | <0.001  |
| Multivariate mean difference                          | 0                                 | 0.060           | 0.123              | 0.158            | 0.005   |
| <b>Intima Medial Thickness, Common Carotid (mm)</b>   |                                   |                 |                    |                  |         |
| Median value                                          | 0.84                              | 0.89            | 0.92               | 0.91             | 0.002   |
| Age-sex-adjusted mean difference                      | 0                                 | 0.020           | 0.056              | 0.041            | <0.001  |
| Multivariate mean difference                          | 0                                 | 0.023           | 0.044              | 0.033            | 0.005   |
| <b>Ankle-Brachial Index</b>                           |                                   |                 |                    |                  |         |
| Median value                                          | 1.13                              | 1.11            | 1.10               | 1.09             | <0.001  |
| Age-sex-adjusted mean difference                      | 0                                 | -0.021          | -0.029             | -0.054           | <0.001  |
| Multivariate mean difference                          | 0                                 | -0.002          | -0.014             | -0.023           | 0.07    |
| <b>Presence of Coronary Artery Calcium</b>            |                                   |                 |                    |                  |         |
| Prevalence (%)                                        | 50.8                              | 54.6            | 52.5               | 61.7             | 0.14    |
| Age-sex-adjusted prevalence ratio                     | 1.00                              | 1.08            | 1.03               | 0.96             | 0.85    |
| Multivariate prevalence ratio                         | 1.00                              | 0.99            | 0.98               | 0.98             | 0.56    |
| <b>Mean Agatston Score*</b>                           |                                   |                 |                    |                  |         |
| Median value                                          | 95.4                              | 68.2            | 84.4               | 128              | 0.75    |
| Age-sex-adjusted mean difference                      | 0                                 | -11.8           | -6.8               | 4.5              | 0.60    |
| Multivariate mean difference                          | 0                                 | -7.3            | -5.8               | 12.9             | 0.91    |

Online Supplement Table 1, ctd.

|                                                       | Airflow Obstruction Among Never Smokers |                 |                    |                 | P-trend |
|-------------------------------------------------------|-----------------------------------------|-----------------|--------------------|-----------------|---------|
|                                                       | None<br>(n=1528)                        | Mild<br>(n=103) | Moderate<br>(n=24) | Severe<br>(n=5) |         |
| <b>Intima Medial Thickness, Internal Carotid (mm)</b> |                                         |                 |                    |                 |         |
| Median value                                          | 0.78                                    | 0.83            | 0.74               | 0.74            | 0.23    |
| Age-sex-adjusted mean difference                      | 0                                       | -0.005          | 0.003              | -0.056          | 0.87    |
| Multivariate mean difference                          | 0                                       | 0.004           | 0.002              | 0.035           | 0.89    |
| <b>Intima Medial Thickness, Common Carotid (mm)</b>   |                                         |                 |                    |                 |         |
| Median value                                          | 0.81                                    | 0.83            | 0.83               | 0.74            | 0.27    |
| Age-sex-adjusted mean difference                      | 0                                       | 0.004           | -0.010             | -0.124          | 0.40    |
| Multivariate mean difference                          | 0                                       | 0.007           | -0.031             | -0.120          | 0.25    |
| <b>Ankle-Brachial Index</b>                           |                                         |                 |                    |                 |         |
| Median value                                          | 1.12                                    | 1.14            | 1.10               | 1.18            | 0.39    |
| Age-sex-adjusted mean difference                      | 0                                       | 0.006           | -0.001             | 0.130           | 0.11    |
| Multivariate mean difference                          | 0                                       | 0.007           | -0.006             | 0.130           | 0.11    |
| <b>Presence of Coronary Artery Calcium</b>            |                                         |                 |                    |                 |         |
| Prevalence (%)                                        | 39.7                                    | 45.6            | 41.7               | 40.0            | 0.38    |
| Age-sex-adjusted prevalence ratio                     | 1                                       | 1.03            | 0.94               | 1.18            | 0.90    |
| Multivariate prevalence ratio                         | 1                                       | 1.00            | 0.98               | 0.97            | 0.83    |
| <b>Mean Agatston Score*</b>                           |                                         |                 |                    |                 |         |
| Median value                                          | 55.1                                    | 81.5            | 14.3               | 164             | 0.42    |
| Age-sex-adjusted mean difference                      | 0                                       | 5.8             | -22.2              | 29.4            | 0.47    |
| Multivariate mean difference                          | 0                                       | 5.5             | -18.2              | -5.0            | 0.58    |

\* Among participants with detectable coronary artery calcium

Multivariate models adjusted for age, gender, race/ethnicity, smoking status, pack-years, urine cotinine, educational attainment, diabetes mellitus, fasting plasma glucose, height, body mass index, hypertension, systolic and diastolic blood pressure, LDL, HDL, statin use and C-reactive protein.
