# Supplementary material
Source: PubMed Central journal article supplement (PMC3616898)
Supplement: NIHMS451004-supplement-Text.pdf [file NIHMS451004-supplement-Text.pdf]

**Subclinical Atherosclerosis, Airflow Obstruction and Emphysema:  
the MESA Lung Study**

**Online Data Supplement**

R Graham Barr, MD, DrPH, Firas S Ahmed, MD, MPH, J Jeffery Carr, MD, MS, Eric A Hoffman,  
PhD, Rui Jiang, MD, DrPH, Steven M Kawut, MD, MS, Karol Watson, MD, PhD

## **Results of Quality Control (QC) Replicate Measures**

### *Carotid Intima-Media Thickness (10% QC replicates)*

Intra-class correlation coefficients (ICC) for common and internal carotid IMT were >0.98 for intra-reader reproducibility and 0.87 and 0.94, respectively, for inter-reader reproducibility.

### *Ankle-Brachial Index (10% QC replicates)*

ICCs for intra-technician and inter-technician reproducibility were 0.95 and 0.92, respectively.

### *Coronary Artery Calcium (100% QC replicates)*

The kappa statistic for inter-scan reproducibility of CAC prevalence was 0.92. The inter-scan ICC for the Agatston score exceeded 0.99.

### *Spirometry (10% QC replicates)*

The intra-technician ICCs for the FEV<sub>1</sub> and FVC were both 0.99; the corresponding inter-technician ICCs were both 0.98.

### *Percent Emphysema (100% QC replicates)*

The inter-scan ICC for was 0.94.

All QC results suggest excellent reproducibility of these measures.

## **Clinical Covariates**

Hypertension was defined as systolic blood pressure  $\geq$  140 mm Hg, diastolic blood pressure  $\geq$  90 mm Hg or currently use of anti-hypertension medication. Presence of diabetes mellitus was based on self-reported physician diagnosis, use of medication for hyperglycemia, or a fasting plasma glucose  $\geq$ 126 mg/dL (Johnson & Johnson Clinical Diagnostics, Inc., Rochester, NY). C-reactive protein and cholesterol were measured with standard methods (BNII nephelometer; High Sensitivity CRP; Dade Behring Inc., Deerfield, IL; cholesterol oxidase method, Roche Diagnostics).
